# Supplementary material
Source: ML conference proceedings conference paper supplement (https://openaccess.thecvf.com/content/ICCV2025/html/Xu_ChartPoint_Guiding_MLLMs_ICCV_2025_paper.html)
Supplement: Supplementary file 1 [file Xu_ChartPoint_Guiding_MLLMs_ICCV_2025_supplemental.pdf]

# ChartPoint: Guiding MLLMs with Grounding Reflection for Chart Reasoning

## Supplementary Material

### A. Example Visualization

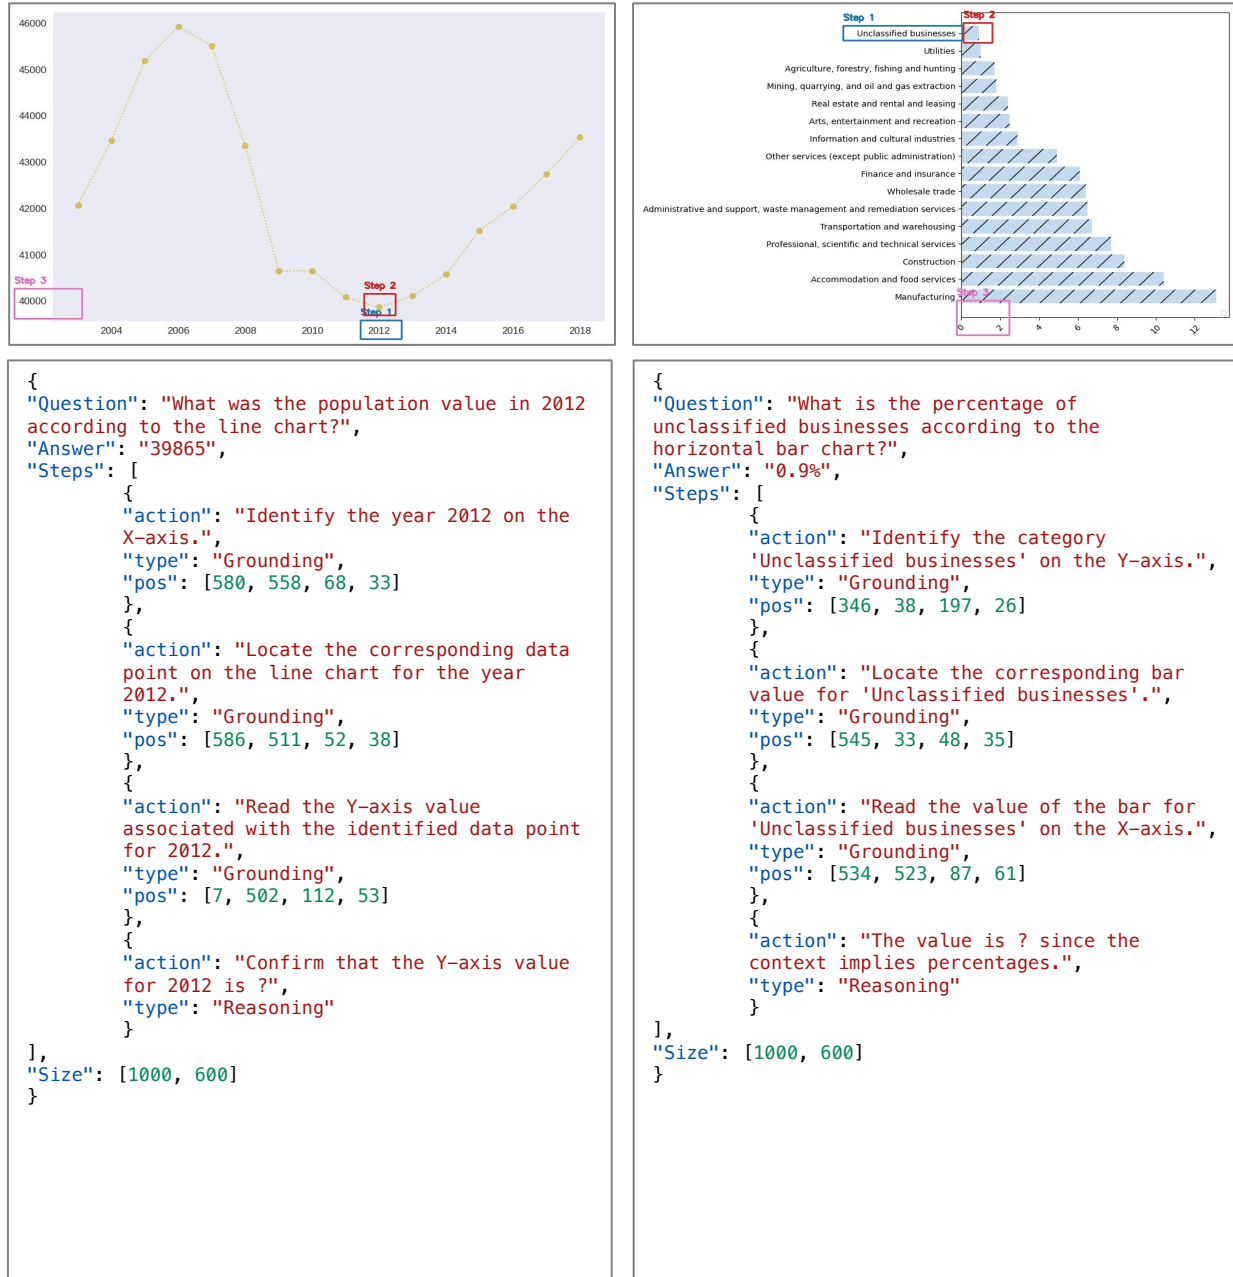

Figure 7. The detail of PointCoT and the display of the chart after BBox rendering (part 1).

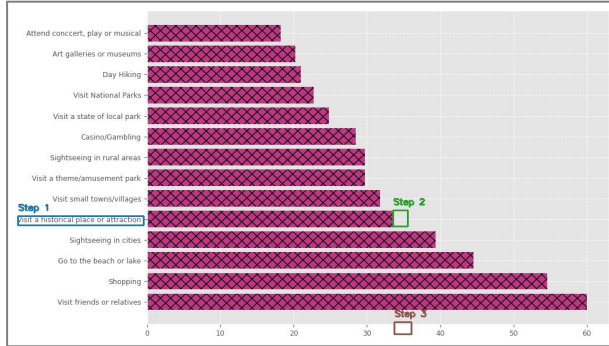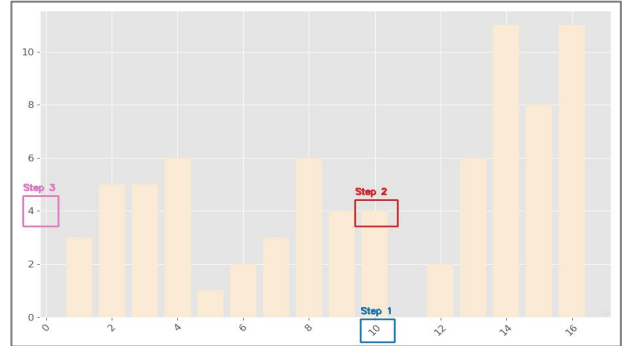

```
{
  "Question": "What is the percentage of people who chose 'Visit a historical place or attraction' as their activity?",
  "Answer": "33.6%",
  "Steps": [
    {
      "action": "Identify the category 'Visit a historical place or attraction' on the Y-axis.",
      "type": "Grounding",
      "pos": [16, 373, 206, 16]
    },
    {
      "action": "Locate the corresponding value on the X-axis for 'Visit a historical place or attraction'.",
      "type": "Grounding",
      "pos": [631, 363, 24, 28]
    },
    {
      "action": "Note the value is ?",
      "type": "Grounding",
      "pos": [633, 558, 28, 21]
    },
    {
      "action": "Recognize that the values represent percentages since they are likely representing survey results or statistical data.",
      "type": "Reasoning"
    },
    {
      "action": "Conclude that the percentage is ?.",
      "type": "Reasoning"
    }
  ],
  "Size": [1000, 600]
}
```

```
{
  "Question": "What is the value of y when x equals 10?",
  "Answer": "4",
  "Steps": [
    {
      "action": "Identify the x-axis and locate the position for x = 10.",
      "type": "Grounding",
      "pos": [573, 553, 56, 40]
    },
    {
      "action": "Identify the corresponding bar height for x = 10.",
      "type": "Grounding",
      "pos": [564, 345, 70, 46]
    },
    {
      "action": "Read the y value from the chart where x = 10.",
      "type": "Grounding",
      "pos": [18, 338, 58, 53]
    },
    {
      "action": "The value read is ?",
      "type": "Reasoning"
    }
  ],
  "Size": [1000, 600]
}
```

Figure 8. The detail of PointCoT and the display of the chart after BBox rendering (part 2).

## B. Prompt Details

### Prompt to Generate Chain of Thought

Given a chart plot code, please propose a **question** based on the code and provide the **answer** to this question. Additionally, provide detailed reasoning steps for arriving at the answer, categorizing each step as either **Grounding** or **Reasoning**.

#### Requirements for the Question:

1. Focus on specific elements within the chart, such as the chart title, data values for specific categories, or identifying peak values.
2. **Do not** ask descriptive or summary questions, like describing trends or summarizing the chart's message.
3. **Do not** ask about visually non-distinguishing details, such as font type or size of the title.

#### Requirements for Thinking Steps:

1. Categorize each step into two types: **Grounding** and **Reasoning**.
2. **Grounding** steps involve locating elements within the chart, such as identifying positions on axes or legend entries.
3. **Reasoning** steps involve logical deductions based on information gathered from previous grounding steps.

#### Output Format Requirements:

1. Do not include any extraneous text unrelated to the content.
2. Strictly follow the JSON format for the response.
3. Refer to the example provided below for the expected structure.

#### Example:

{#EXAMPLE.HERE}

Now, given the chart plot code, please provide the **Question**, **Answer**, and **Steps**. Output strictly in the given example format.

#### Chart Plot Code

{#CODE.HERE}

Your should provide:

### Prompt for Code Editing

You are provided with Python code that generates a chart and a specific instruction related to an element within this chart that needs to be highlighted. Your task is to amend the plotting code by adding an '@' symbol at the location specified in the instruction.

#### Requirements:

1. **Chart Plot Code**: The original Python code for generating the chart.
2. **Instruction**: A directive specifying which chart element should be highlighted (e.g., "Locate the bar corresponding to '2018' and 'Domestic'."; "Circle the highest sales month").
3. **Modification**: Integrate an '@' symbol into the chart. This symbol should be centered on the element as indicated – for instance, in the middle of a title, legend, or label, or at the top of a bar.
4. **Output**: Deliver the updated code that correctly places the '@'.

#### Output Format:

1. Provide only the modified code as output.
2. Exclude any text not pertinent to the response content.
3. Ensure the modified code preserves all original chart features while incorporating the specified '@'.

**Example:**

{#EXAMPLE\_HERE}

Now, given the **chart plot code** and **instruction**:

**Instruction:** {#INST\_HERE}.

**Chart Plot Code**

{#CODE\_HERE}

Your should provide:

**Match Style Prompt Engineering****User:**

You are a professional data analyst with expertise in interpreting various types of charts and graphs. When presented with a question about a given chart, your response should adhere to the following guidelines.

**Guidelines:**

1. **Initial Assessment:** Begin by carefully examining the provided chart. Note the type of chart (e.g., bar chart, pie chart, line graph), the labels on the axes (if applicable), the title, and any legends present. Identify the key data points relevant to the question.
2. **Step-by-Step Reasoning:** Break down the process of answering the question into clear, logical steps. Explain each step in detail, referencing specific data from the chart. Use phrases like “First, we look at...”, “Next, we calculate...”, “Then, we compare...”.
3. **Final Answer:** Conclude your response with the final answer presented in the format  $\boxed{\text{answer}}$ , where “answer” is either a single number or a percentage. Do not include any units. Ensure that the answer is accurate based on your analysis.
4. **BBox:** Output bboxes whenever possible to support your understanding of the chart elements.

**Question:** {#QUESTION\_HERE}.

**Assistant:**
